# Supplementary material for: How Expectations Shape the Formation of Intrusive Memories: An Experimental Study Using the Trauma Film Paradigm
Source: Springer Nature journal article supplement (doi:10.1007/s10608-022-10290-4), 2022-01-28
Supplement: MOESM2 [file 20073992]

**Experimental Manipulation (Video Instruction)**

**Instructions for trauma expert**

**EG 1:**

The film you have just seen showed scenes that have a disturbing and cruel effect on many people.

It is known from trauma research, as well as from clinical practice, that such horrible images as you have seen are often burned into the memory and later appear repeatedly before the inner eye, in the form of so-called "intrusions" - of particularly strong intensity also called "flashbacks". Most often, these intrusions are relived very vividly in the form of images, sounds, thoughts, words, phrases, feelings, or some combination of these. You can think of it as the images of a traumatic event popping up in your consciousness over and over again very suddenly, causing significant stress. This is likely to be the case with you increasingly over the next week as well. It is important to know that you usually cannot consciously prevent or influence the reappearance of the images in the form of intrusions and flashbacks.

It is easy to understand neurobiologically how such intrusions occur. Extreme stress situations trigger changes in the brain, especially in the so-called amygdala. Overexcitation of this brain structure, such as when watching the movie you just saw, means that the traumatic memories cannot be stored in the brain's "cold memory" as usual. Instead, the memories are repeatedly evoked by very different triggers and relived on the same emotional quality - that is, stored in the so-called "hot memory." These triggers are usually related to the traumatic situation. Since many everyday things were shown in the film in connection with the horrible images, it is likely that in the next few days even quite ordinary situations will often be enough to trigger such memories in you. Therefore, the body is exposed to enormous stress here, again and again.

It is therefore very likely that you will also increasingly relive intrusions of the film clips you have just seen in the next few days. Probably you will not be able to control the appearance of the mental images, they will appear quite suddenly and automatically. You will probably be emotionally agitated by these intrusions and will find it difficult to detach yourself from them at first.

If you feel that you cannot cope well on your own with these recurring and unpleasant memories of the film in the next few days, or if you notice that you need help, please contact the study directors Dr. Kube or Mr. Herzog or the Psychotherapie-Ambulanz Marburg (PAM).

Thank you very much for taking the time to support this important research!

**EG 2:**

You have just had to watch terrible images and may still be a little shaken up as a result. Therefore, that you can go home reassured and get a good night's sleep, I want to give you some information that will hopefully take away some of the fear of lasting memories caused by the film.

I can well imagine that the film just shown has been stressful for you. First of all, it is important to know that not every stressful situation is also experienced and processed as traumatic. In this research, we speak of so-called "potentially traumatic events" that lead to long-term impairments in only a very small number of people. This means that, as a rule, no so-called trauma consequences occur. The most frequent trauma consequences include recurring and suddenly occurring memories. Such spontaneously occurring memories are also called "intrusions".

However, do not worry: it is very unlikely that intrusions will occur in your case. We know from research that such trauma episodes usually do not occur when people have sufficient resources to cope with such stressful events. That is, in people who are psychologically stable and healthy overall, intrusions do not occur in the vast majority of cases, even though stressful events have been experienced. Therefore, to ensure that intrusions do not occur in our study participants, it was important for us to include only individuals who are psychologically stable and resilient in the study.

They can certainly remember the detailed preliminary examinations that were conducted with them at the beginning as part of the study. The results obtained in this preliminary examination indicate that you are psychologically stable and healthy. This is one of the reasons why we selected you to participate in the study. We are therefore very sure that the film clip will not bother you further in the next few days and that you will process it well, although it may have been disturbing at first. In all likelihood, the memories of the film clip will fade after today and you will quickly be able to go about your usual daily routine without any problems. Within the next few days, it will no longer play a role in your everyday life.

If, contrary to expectations, you notice that unpleasant memories of the film occur again in the next few days, which you cannot cope with on your own, then you are very welcome to contact the study directors Dr. Kube and Mr. Herzog or to seek help from the Psychotherapie-Ambulanz Marburg (PAM).

Thank you very much for taking the time to support this important research!
