# Supplementary material for: How Expectations Shape the Formation of Intrusive Memories: An Experimental Study Using the Trauma Film Paradigm
Source: Springer Nature journal article supplement (doi:10.1007/s10608-022-10290-4), 2022-01-28
Supplement: MOESM4 [file 20073992]

**M-submodel: influence on expectations.** When the influence of post-state anxiety (X) on expectations (M) was analysed, the statistical analyses showed that X had a highly significant influence on M, F (1, 87) = 30.48, p < .001. Overall, 22% of the variance in the variable expectations (M) were explained (R2 = .22), reflecting a large effect according to Cohen (1992) (f2 = .28). The regression analysis showed a significant negative main effect of X on M, b = -.21, t = -5.52, p < .001, Boot CI [-.281, -.132], i.e., a higher post-state anxiety was associated with more negative expectations.

**Y-submodel: influence on the intrusion experience.** The variables post-state anxiety (X) and expectations (M) had a common significant influence on the intrusion experience (Y), F (2, 86) = 7.04, p < .001. Taken together, the variables explained 11% of the variance in the dependent variable (R2 = .11), which, according to Cohen (1992), indicates a moderate effect (f2 = .12). The regression analysis from M to Y showed a significant negative main effect, b = -.08, t = -2.23, p = .02, Boot CI [-.141, -.013]. As mentioned, there was no significant direct effect of X on Y, b = .02, t = 1.33, p = .19, Boot CI [-.010, .056].
