# Supplementary material for: How Expectations Shape the Formation of Intrusive Memories: An Experimental Study Using the Trauma Film Paradigm
Source: Springer Nature journal article supplement (doi:10.1007/s10608-022-10290-4), 2022-01-28
Supplement: MOESM5 [file 20073992]

**Results of the exploratory analysis**

**Mediation analysis using intrusion distress (IES-R intrusion subscale).** The total effect of the independent variable "post-state-anxiety" (X) on the dependent variable, the “intrusion distress” (Y) as measured by the IES-R intrusion subscale, was analyzed. The regression analysis showed that the post-state-anxiety significantly predicted the intrusion distress, *b* = .09, *t* = 3.00, *p* < .01, *CI* [.031, .153]. The results of the indirect effect indicate that the influence of the post-state-anxiety (X) on the intrusion distress (Y) was mediated by expectations (M), *bindirect* = .03, *boot CI* [.007, .060]. Including the mediator, there was no significant direct effect of post-state-anxiety on intrusion distress, *b* = .06, *t* = 1.84, *p* = .07, *CI* [-.005, .126]. This means that the influence of post-state-anxiety on the intrusion distress was completely mediated via expectations.

**Mediation analysis using intrusion frequency (intrusion diary).** The total effect of the independent variable "post-state-anxiety" (X) on the dependent variable "intrusion frequency" (Y) was analyzed. The regression analysis showed that the post-state-anxiety did not significantly predict intrusion frequency, *b* = .03, *t* = 0.78, *p* = .44, *CI* [-.042, .095]. The results of the indirect effect suggest that the influence of the post-state-anxiety (X) on the intrusion frequency (Y) was not mediated by expectations (M), *bindirect* = .02, *boot CI* [-.008, .057]. Including the mediator, there was no significant direct effect of post-state-anxiety on intrusion frequency, *b* = .01, *t* = 0.18, *p* = .86, *CI* [-.074, .089].
